# Supplementary material for: Models of persecutory delusions: a mechanistic insight into the early stages of psychosis
Source: PubMed Central journal article supplement (PMC6756090; doi:10.1038/s41380-019-0427-z), 2019-05-10
Supplement: 41380_2019_427_MOESM2_ESM.pdf [file 41380_2019_427_MOESM2_ESM.pdf]



**Physiology**

- Synaptic Plasticity
- Neuromodulation

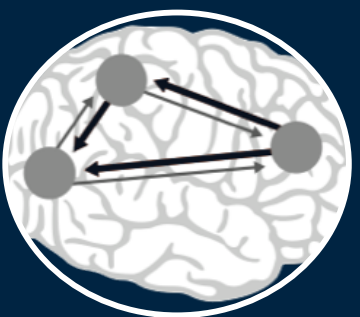

**Generative Models**

- Neural Model
- Forward Model



**Noninvasive Measurements**

- EEG
- fMRI
- Performance Accuracy

**Clinical Decisions**

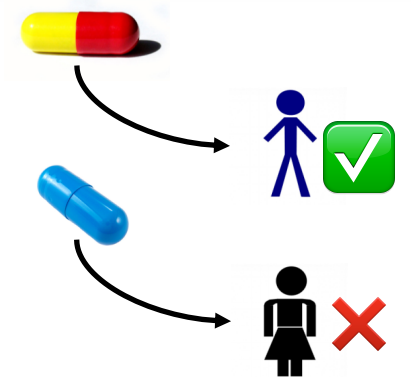

**Mechanistic Basis**


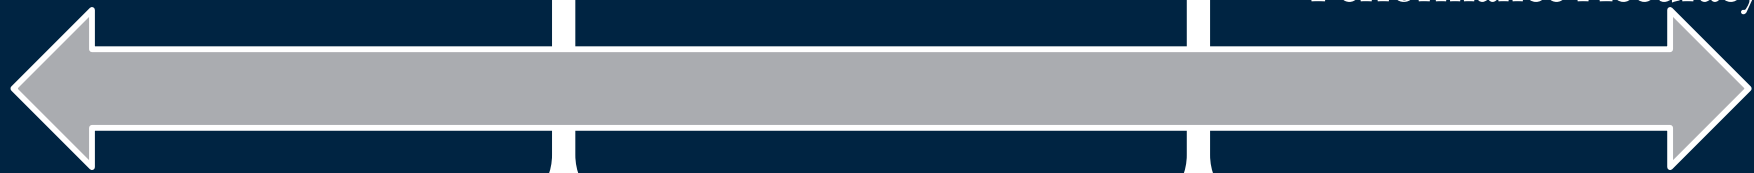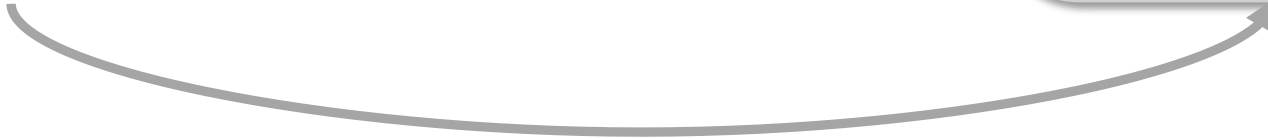

parameters

Figure 1
