# Supplementary material for: Models of persecutory delusions: a mechanistic insight into the early stages of psychosis
Source: PubMed Central journal article supplement (PMC6756090; doi:10.1038/s41380-019-0427-z), 2019-05-10
Supplement: 41380_2019_427_MOESM4_ESM.pdf [file 41380_2019_427_MOESM4_ESM.pdf]

# Generative model of beliefs

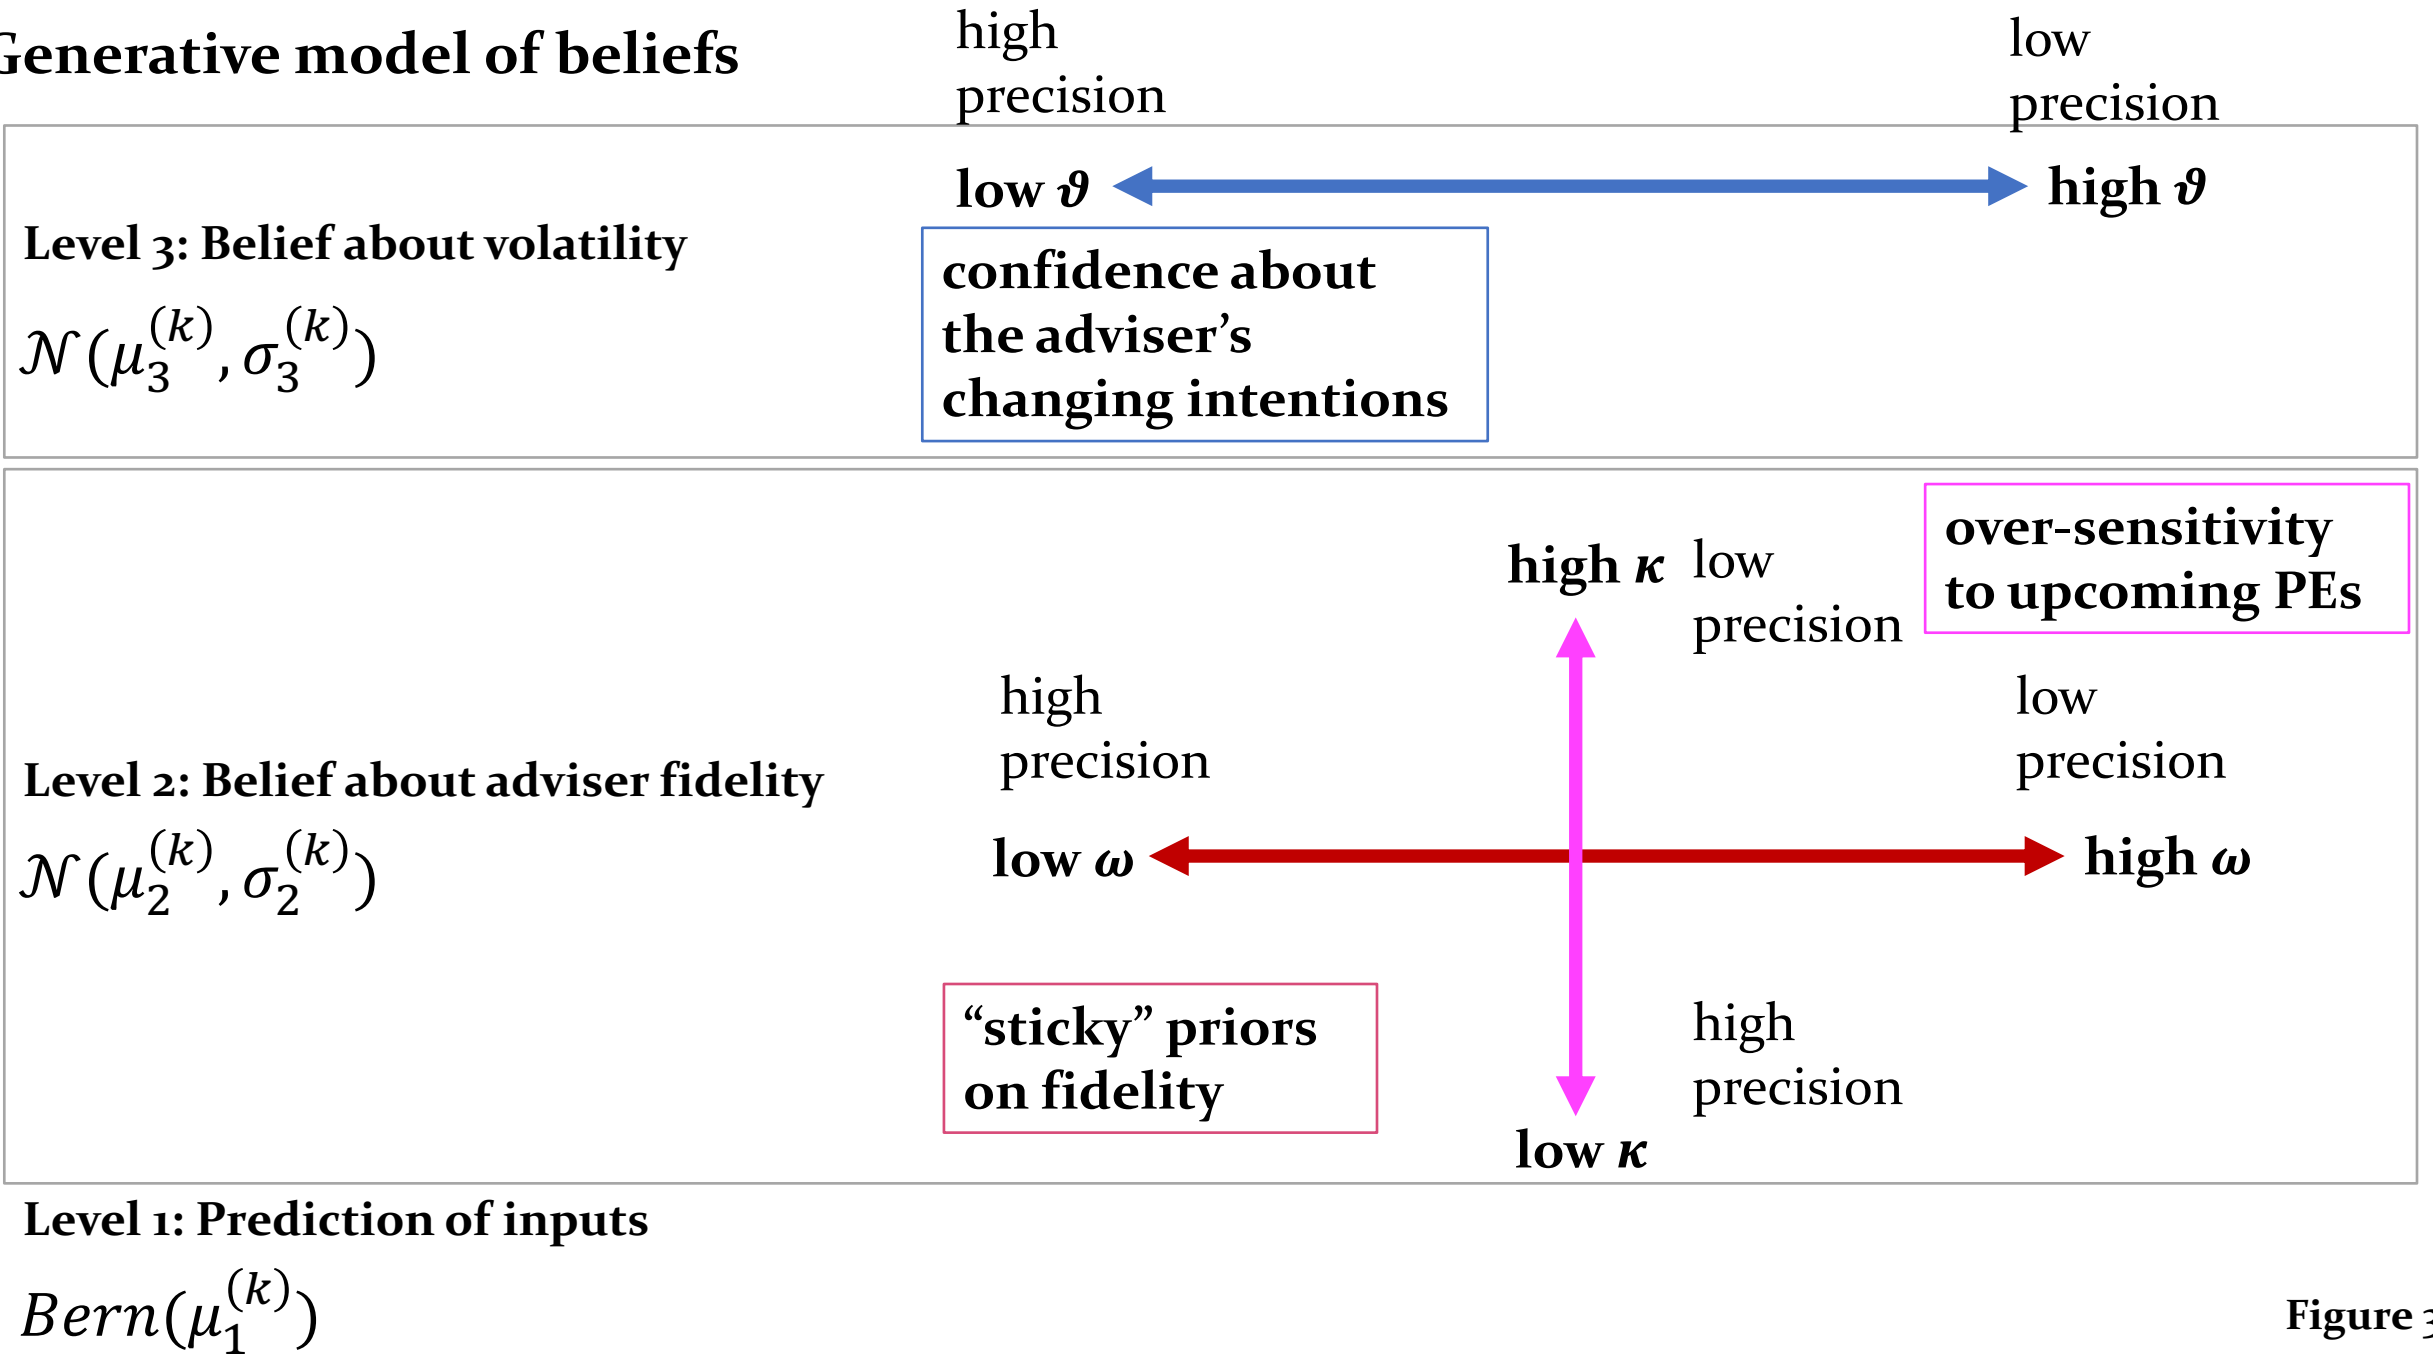

Figure 3
